# Supplementary material
Source: PubMed Central journal article supplement (PMC6156184)
Supplement: supp_the2017-0582_onco12422-sup-0001-suppinfo01.pdf [file supp_the2017-0582_onco12422-sup-0001-suppinfo01.pdf]

Supplemental Tables for:  
 Osimertinib: A Novel Dermatologic Adverse Event Profile in Patients with Lung Cancer  
 Mario Lacouture et al.

**Table S1.** NSCLC patients treated with osimertinib referred for dAE at MSKCC

| Age (y) | Sex | AE (grade)                                             | Intervention                                                                                            | AE outcome | Additional information (histology, lab values)                                                                                                                                                                                                                                                            |
|---------|-----|--------------------------------------------------------|---------------------------------------------------------------------------------------------------------|------------|-----------------------------------------------------------------------------------------------------------------------------------------------------------------------------------------------------------------------------------------------------------------------------------------------------------|
| 60      | F   | Xerosis (2)<br>Skin infection (1)<br>Brittle nails (1) | Ammonium lactate 12%<br>Mupirocin 2% ointment<br>Biotin 2.5 mg/d<br>Poly-ureaurethane 16% nail solution | PR         | Culture: MRSA                                                                                                                                                                                                                                                                                             |
| 72      | F   | Pruritus (2)                                           | Doxepin HCl 5% cream,<br>diclofenac sodium gel                                                          | PR         | Specimen submitted and diagnosis:<br>1. Skin histology analysis, left upper back scapular region, biopsy-punch<br>2. Dermal melanophages and focal perifollicular granulomatous dermatitis; the findings may be due to a resolving interface dermatitis and/or folliculitis; deeper levels were examined. |
| 68      | F   | Thin nails (1)<br>Xerosis (2)                          | Biotin 2.5 mg/d<br>Triamcinolone acetonide ointment                                                     | PR         |                                                                                                                                                                                                                                                                                                           |
| 55      | F   | Xerosis (1)                                            | OTC moisturizer                                                                                         | PR         |                                                                                                                                                                                                                                                                                                           |

Supplemental Tables for:  
Osimertinib: A Novel Dermatologic Adverse Event Profile in Patients with Lung Cancer  
Mario Lacouture et al.

| Age (y) | Sex | AE (grade)                                                                    | Intervention                                                            | AE outcome     | Additional information (histology, lab values)                                                                                                            |
|---------|-----|-------------------------------------------------------------------------------|-------------------------------------------------------------------------|----------------|-----------------------------------------------------------------------------------------------------------------------------------------------------------|
| 70      | F   | Pruritus (2)                                                                  | Triamcinolone acetonide cream                                           | CR             | Specimen submitted and diagnosis:<br>1. Skin histology analysis, right upper back scapular region, biopsy-punch<br>2. Perivascular lymphocytic dermatitis |
| 62      | F   | Xerosis (1)                                                                   | Ammonium lactate 12%                                                    | PR             |                                                                                                                                                           |
| 67      | M   | Acneiform rash (1)<br>Xerosis (2)<br>Nasal vestibulitis<br>skin infection (1) | Metronidazole 1% cream<br>Ammonium lactate 12%<br>Mupirocin 2% ointment | SD<br>PR<br>SD |                                                                                                                                                           |
| 55      | F   | Acneiform rash (1)<br>Xerosis (1)                                             | Alclometasone 0.05%/dapson 5% gel<br>Ammonium lactate 12%               | PR             |                                                                                                                                                           |
| 41      | F   | Xerosis (2)                                                                   | Ammonium lactate 12% and salicylic acid 6%                              | PR             |                                                                                                                                                           |
| 59      | F   | Paronychia (2)<br>Xerosis (1)                                                 | Nail avulsion                                                           | CR             | Specimens submitted:<br>1. Left great toe; partial nail avulsion                                                                                          |

Supplemental Tables for:  
 Osimertinib: A Novel Dermatologic Adverse Event Profile in Patients with Lung Cancer  
 Mario Lacouture et al.

| Age (y) | Sex | AE (grade)                                       | Intervention                                                                      | AE outcome   | Additional information (histology, lab values)                                                                                                                                                                                                                    |
|---------|-----|--------------------------------------------------|-----------------------------------------------------------------------------------|--------------|-------------------------------------------------------------------------------------------------------------------------------------------------------------------------------------------------------------------------------------------------------------------|
|         |     |                                                  | Ammonium lactate 12%                                                              |              | 2. Right great toe; partial nail avulsion – 2 pieces<br><br>Diagnosis:<br>1. Nail, left great toe; partial nail avulsion: onychomycosis<br>2. Nail, right great toe; partial nail avulsion: onychomycosis<br><br>Note: PAS stains were positive in both specimens |
| 75      | F   | Pruritus (2)<br>Xerosis (1)<br>Brittle nails (1) | Triamcinolone acetonide cream<br>Ammonium lactate 12%<br>Biotin 2.5 mg/d          | CR           |                                                                                                                                                                                                                                                                   |
| 53      | F   | Acneiform rash (1)<br><br>Xerosis (2)            | Brimonidine tartrate 0.33% gel, metronidazole 0.75% cream<br>Ammonium lactate 12% | SD<br><br>PR |                                                                                                                                                                                                                                                                   |
| 73      | M   | Urticaria (2)<br>Acneiform rash (1)              | Clobetasol 0.05%, hydroxyzine<br>Alclometasone 0.05%                              | CR           |                                                                                                                                                                                                                                                                   |

Supplemental Tables for:  
Osimertinib: A Novel Dermatologic Adverse Event Profile in Patients with Lung Cancer  
Mario Lacouture et al.

| Age (y) | Sex | AE (grade)                        | Intervention                                 | AE outcome                               | Additional information (histology, lab values)                                       |            |    |
|---------|-----|-----------------------------------|----------------------------------------------|------------------------------------------|--------------------------------------------------------------------------------------|------------|----|
| 64      | F   | Acneiform rash/skin infection (2) | Fluocinolone acetonide oil 0.01%, cefadroxil | PR                                       | Coagulase-negative <i>Staphylococcus</i> resistant                                   |            |    |
|         |     |                                   | Xerosis (2)                                  | Salicylic acid 6%, triamcinolone acetate |                                                                                      | PR         |    |
|         |     |                                   |                                              | Pruritus (2)                             |                                                                                      | Pregabalin | PR |
|         |     |                                   |                                              |                                          |                                                                                      |            |    |
| 73      | F   | Paronychia (2)<br>Xerosis (2)     | Partial nail avulsion                        | PR                                       | <i>Staphylococcus aureus</i> , <i>Proteus mirabilis</i> , <i>Morganella morganii</i> |            |    |
|         |     |                                   | Ammonium lactate 12%                         | PR                                       |                                                                                      |            |    |
| 48      | F   | Xerosis (2)                       | Salicylic acid 6%, ammonium lactate 12%      | PR                                       |                                                                                      |            |    |
| 74      | F   | Alopecia (1)                      | Biotin 2.5 mg/d                              | SD                                       |                                                                                      |            |    |
|         |     | Pruritus (1)                      |                                              |                                          |                                                                                      |            |    |
|         |     | Xerosis (1)                       | Ammonium lactate 12%                         | CR                                       |                                                                                      |            |    |
| 55      | F   | Acneiform rash (1)                | Alclometasone 0.05%/dapson 5% gel            | SD                                       |                                                                                      |            |    |
|         |     | Hyperpigmentation (1)             | Hydroquinone 4%/salicylic acid 6%            | NA                                       |                                                                                      |            |    |
|         |     |                                   |                                              |                                          |                                                                                      |            |    |

Supplemental Tables for:  
 Osimertinib: A Novel Dermatologic Adverse Event Profile in Patients with Lung Cancer  
 Mario Lacouture et al.

| Age | Sex | AE (grade)  | Intervention         | AE outcome | Additional information (histology, lab values) |
|-----|-----|-------------|----------------------|------------|------------------------------------------------|
| (y) |     | Xerosis (1) | Ammonium lactate 12% | SD         |                                                |

Abbreviations: dAEs, dermatologic adverse events; CR, complete response; F, female; M, male; MRSA, methicillin-resistant *Staphylococcus aureus*; MSKCC, Memorial Sloan Kettering Cancer Center; NA, not available; NSCLC, non-small cell lung cancer; OTC, over-the-counter; PAS, Periodic acid-Schiff; PR, partial response; SD, stable disease; y, year(s).

Supplemental Tables for:  
 Osimertinib: A Novel Dermatologic Adverse Event Profile in Patients with Lung Cancer  
 Mario Lacouture et al.

**Table S2.** NSCLC patients treated with osimertinib referred for dAEs at NTUH

| Age (y) | Sex | Osimertinib initiation | AE (grade)                                                   | Intervention                                                                                                                                                             | AE outcome                                                 | Additional information         |
|---------|-----|------------------------|--------------------------------------------------------------|--------------------------------------------------------------------------------------------------------------------------------------------------------------------------|------------------------------------------------------------|--------------------------------|
| 41      | F   | 1L – 80 mg/d for 1 y   | Acneiform rash (1), pruritus (1), xerosis (1)                | Desloratadine and buclizine for pruritus; fluticasone 0.05% cream for trunk eczema; desoximetasone 0.25% ointment for limb eczema; tetracycline 1% ointment for fissures | Improved                                                   |                                |
| 68      | M   | 2L – 80 mg/d for 10 mo | Acneiform rash (1), pruritus (1), xerosis (1) paronychia (1) | Levocetirizine for pruritus; fluticasone 0.05% cream for eczema; tetracycline 1% ointment for fissures and paronychia; urea 10% cream for generalized xerosis            | Pruritus and acneiform rash improved; paronychia persisted | Combine selumetinib 75 mg q12h |
| 69      | M   | >3L – 80 mg/d for      | Acneiform rash (1),                                          | Tetracycline 1% ointment for                                                                                                                                             | Acneiform rash and xerosis improved 3 mo                   |                                |

Supplemental Tables for:  
 Osimertinib: A Novel Dermatologic Adverse Event Profile in Patients with Lung Cancer  
 Mario Lacouture et al.

| Age (y) | Sex | Osimertinib initiation   | AE (grade)                                            | Intervention                                                                                                                                                                                                                                                                                    | AE outcome                                                                           | Additional information |
|---------|-----|--------------------------|-------------------------------------------------------|-------------------------------------------------------------------------------------------------------------------------------------------------------------------------------------------------------------------------------------------------------------------------------------------------|--------------------------------------------------------------------------------------|------------------------|
|         |     | 2 mo                     | xerosis (1),<br>paronychia<br>(3[1])                  | paronychia; silver<br>nitrate application once<br>weekly                                                                                                                                                                                                                                        | later; paronychia<br>improved 9 mo later                                             |                        |
| 53      | M   | 3L – 40 mg/d<br>for 2 mo | Paronychia<br>(3[1]);<br>pruritus (1),<br>xerosis (1) | Doxymycin EC 100<br>mg/cap for 2 wk,<br>tetracycline 1%<br>ointment for<br>paronychia; silver<br>nitrate application once<br>weekly; hydrocortisone<br>acetate 1% ointment<br>and tetracycline 1%<br>ointment for fissures;<br>desoximetasone 0.25%<br>ointment bid for leg and<br>trunk eczema | Pruritus and acneiform<br>rash improved;<br>paronychia grade 1<br>persisted for 7 mo |                        |
| 65      | F   | 2L – 80 mg/d<br>for 9 mo | None                                                  |                                                                                                                                                                                                                                                                                                 |                                                                                      |                        |
| 47      | F   | 1L – 80 mg/d<br>for 2 mo | Acneiform<br>rash (1),                                | Fluticasone for<br>acneiform rash and                                                                                                                                                                                                                                                           | Acneiform rash<br>improved; paronychia                                               |                        |

Supplemental Tables for:  
 Osimertinib: A Novel Dermatologic Adverse Event Profile in Patients with Lung Cancer  
 Mario Lacouture et al.

| Age (y) | Sex | Osimertinib initiation | AE (grade)                                         | Intervention                                                                                                                                                                                                    | AE outcome                                                         | Additional information         |
|---------|-----|------------------------|----------------------------------------------------|-----------------------------------------------------------------------------------------------------------------------------------------------------------------------------------------------------------------|--------------------------------------------------------------------|--------------------------------|
|         |     |                        | xerosis (1), Paronychia (3[2])                     | tetracycline 1% ointment for fissures and paronychia; silver nitrate application once weekly; hydrocortisone acetate 1% ointment for xerosis; fusidic acid cream for folliculitis                               | persisted for 32 mo                                                |                                |
| 35      | M   | 3L – 80 mg/d for 3 mo  | Paronychia (2)                                     | Silver nitrate application every wk                                                                                                                                                                             | Paronychia improved 1 mo later                                     | Combine selumetinib 75 mg q12h |
| 57      | F   | 3L – 80 mg/d for 1 mo  | Acneiform rash (1), xerosis (1), paronychia (3[1]) | Levocetirizine and fluticasone for acneiform rash and tetracycline 1% ointment for fissures and paronychia; silver nitrate application once weekly; hydrocortisone acetate 1% ointment for acneiform rash; urea | Acneiform rash improved; xerosis and paronychia persisted for 4 mo |                                |



Supplemental Tables for:  
 Osimertinib: A Novel Dermatologic Adverse Event Profile in Patients with Lung Cancer  
 Mario Lacouture et al.

| Age (y) | Sex | Osimertinib initiation | AE (grade)                | Intervention                                                                                                                                                                                                                                                          | AE outcome                              | Additional information |
|---------|-----|------------------------|---------------------------|-----------------------------------------------------------------------------------------------------------------------------------------------------------------------------------------------------------------------------------------------------------------------|-----------------------------------------|------------------------|
|         |     |                        |                           | 10% cream for generalized xerosis                                                                                                                                                                                                                                     |                                         |                        |
| 87      | M   | 3L – 80 mg/d for 9 mo  | Xerosis (1), pruritus (3) | Tetracycline 1% ointment for fissures; hydrocortisone acetate 1% ointment for xerotic eczema; fexofenadine 120 mg/d and doxepin 25 mg plus buclizine 50 mg every night for pruritus; aprepitant 125 mg loading and then 80 mg every other day for refractory pruritus | Xerosis and pruritus persisted for 9 mo |                        |
| 47      | F   | 2L – 80 mg/d for 7 mo  | None                      |                                                                                                                                                                                                                                                                       |                                         |                        |
| 52      | F   | 2L – 80 mg/d for 15 mo | None                      |                                                                                                                                                                                                                                                                       |                                         |                        |
| 72      | F   | 2L – 80 mg/d           | None                      |                                                                                                                                                                                                                                                                       |                                         |                        |

Supplemental Tables for:  
 Osimertinib: A Novel Dermatologic Adverse Event Profile in Patients with Lung Cancer  
 Mario Lacouture et al.

| Age (y) | Sex | Osimertinib initiation         | AE (grade)                | Intervention                                                                                             | AE outcome                     | Additional information |
|---------|-----|--------------------------------|---------------------------|----------------------------------------------------------------------------------------------------------|--------------------------------|------------------------|
|         |     | for 10 mo                      |                           |                                                                                                          |                                |                        |
| 79      | F   | 2L – 80 mg/d                   | None                      |                                                                                                          |                                |                        |
|         |     | for 6 mo                       |                           |                                                                                                          |                                |                        |
| 66      | F   | 2L – 80 mg/d                   | None                      |                                                                                                          |                                |                        |
|         |     | for 6 mo                       |                           |                                                                                                          |                                |                        |
| 53      | F   | 2L – 80 mg/d                   | Paronychia (1)            | Tetracycline 1% ointment for paronychia; silver nitrate application once weekly                          | Paronychia improved 1 mo later |                        |
|         |     | for 2 mo                       |                           |                                                                                                          |                                |                        |
| 60      | F   | 1L – 160 mg/d for 2 y and 4 mo | Pruritus (1), xerosis (1) | Hydrocortisone acetate 1% ointment for xerosis; chlorpheniramine maleate/lidocaine ointment for pruritus | Improved 1 mo later            |                        |
| 57      | F   | 3L – 80 mg/d                   | None                      |                                                                                                          |                                |                        |
|         |     | for 2 mo                       |                           |                                                                                                          |                                |                        |
| 52      | F   | >3L – 80 mg/d for 3 mo         | Pruritus (1)              | Levocetirizine for pruritus                                                                              | Improved 1 mo later            |                        |

Supplemental Tables for:  
 Osimertinib: A Novel Dermatologic Adverse Event Profile in Patients with Lung Cancer  
 Mario Lacouture et al.

| Age (y) | Sex | Osimertinib initiation | AE (grade)                                    | Intervention                                                                                                                                                                                                                   | AE outcome                                            | Additional information         |
|---------|-----|------------------------|-----------------------------------------------|--------------------------------------------------------------------------------------------------------------------------------------------------------------------------------------------------------------------------------|-------------------------------------------------------|--------------------------------|
| 48      | F   | 2L – 80 mg/d for 2 mo  | None                                          |                                                                                                                                                                                                                                |                                                       |                                |
| 76      | F   | 3L – 80 mg/d for 7 mo  | Paronychia (1)                                | Tetracycline 1% ointment for paronychia                                                                                                                                                                                        | Paronychia improved 2 mo later                        | Combine selumetinib 50 mg q12h |
| 48      | F   | >3L – 80 mg/d for 5 mo | Paronychia (1)                                | Tetracycline 1% ointment for paronychia                                                                                                                                                                                        | Paronychia improved 1 mo later                        | Combine selumetinib 75 mg q12h |
| 79      | F   | 2L – 80 mg/d for 2 mo  | Acneiform rash (2), xerosis (1), pruritus (1) | Desoximetasone 0.25% ointment bid for limb eczema; chlorpheniramine maleate/lidocaine ointment for pruritus; urea 10% cream for xerosis; tetracycline 1% ointment for fissures and wounds; fusidic acid cream for folliculitis | Acneiform rash, pruritus, xerosis improved 6 mo later |                                |
| 57      | F   | 2L – 80 mg/d for 2 mo  | Acneiform rash (2),                           | Tetracycline 1% ointment for                                                                                                                                                                                                   | Acneiform rash improved, pruritus,                    | Combine selumetinib 75 mg q12h |

Supplemental Tables for:  
 Osimertinib: A Novel Dermatologic Adverse Event Profile in Patients with Lung Cancer  
 Mario Lacouture et al.

| Age (y) | Sex | Osimertinib initiation  | AE (grade)                                   | Intervention                                                                                                                                                                                                           | AE outcome                                           | Additional information |
|---------|-----|-------------------------|----------------------------------------------|------------------------------------------------------------------------------------------------------------------------------------------------------------------------------------------------------------------------|------------------------------------------------------|------------------------|
|         |     |                         | xerosis (2), pruritus (2), paronychia (3[2]) | paronychia; sliver nitrate treatment monthly; hydrocortisone acetate 1% ointment for xerotic eczema; clobetasol propionate ointment for eczema on the legs; oral cephalexin for severe paronychia on the right big toe | xerosis, and paronychia persisted for 12 mo          |                        |
| 75      | F   | 2L – 80 mg/d for 7 mo   | None                                         |                                                                                                                                                                                                                        |                                                      |                        |
| 61      | F   | >3L – 80 mg/d for 22 mo | None                                         |                                                                                                                                                                                                                        |                                                      |                        |
| 59      | F   | 2L – 80 mg/d for 2 mo   | None                                         |                                                                                                                                                                                                                        |                                                      |                        |
| 81      | F   | 3L – 80 mg/d for 1 mo   | Acneiform rash (3); cellulitis               | Oral cephalexin for right leg cellulitis; chloramphenicol                                                                                                                                                              | Acneiform rash improved after intravenous cephalexin |                        |

Supplemental Tables for:  
 Osimertinib: A Novel Dermatologic Adverse Event Profile in Patients with Lung Cancer  
 Mario Lacouture et al.

| Age (y) | Sex | Osimertinib initiation                                      | AE (grade)                                    | Intervention                                                                | AE outcome                                               | Additional information         |
|---------|-----|-------------------------------------------------------------|-----------------------------------------------|-----------------------------------------------------------------------------|----------------------------------------------------------|--------------------------------|
|         |     |                                                             |                                               | ointment for wounds and pustules                                            | and D/C osimertinib                                      |                                |
| 57      | M   | 2L – 80 mg/d for 2 mo                                       | Xerosis (1), paronychia (1)                   | Tetracycline 1% ointment for paronychia; moisturizer for xerosis            | Xerosis and paronychia persisted for 4 mo                | Combine selumetinib 75 mg q12h |
| 65      | F   | 3L – 80 mg/d for 9 mo                                       | None                                          |                                                                             |                                                          |                                |
| 61      | M   | 2L – 80 mg/d for 2 mo                                       | None                                          |                                                                             |                                                          |                                |
| 60      | F   | 3L – 80 mg/d for 2 mo                                       | Acneiform rash (1), xerosis (1), pruritus (1) | Desoximetasone 0.25% ointment for eczema on the four limbs; moisturizer use | Acneiform rash, xerosis and pruritus improved 1 mo later |                                |
| 78      | M   | 3L – 40 mg/d for 26 mo and then change to 80 mg/d for 14 mo | None                                          |                                                                             |                                                          |                                |

Supplemental Tables for:  
 Osimertinib: A Novel Dermatologic Adverse Event Profile in Patients with Lung Cancer  
 Mario Lacouture et al.

| Age (y) | Sex | Osimertinib initiation  | AE (grade)                                                    | Intervention                                                                                                                              | AE outcome                                                                               | Additional information |
|---------|-----|-------------------------|---------------------------------------------------------------|-------------------------------------------------------------------------------------------------------------------------------------------|------------------------------------------------------------------------------------------|------------------------|
| 76      | F   | 2L – 80 mg/day for 5 mo | None                                                          |                                                                                                                                           |                                                                                          |                        |
| 77      | F   | 3L – 80 mg/d for 1 mo   | Paronychia (1), pruritus (2), acneiform rash (1), xerosis (1) | Chloramphenicol ointment for wounds; buclizine for pruritus; desoximetasone 0.25% ointment for acneiform rash; urea 10% cream for xerosis | Acneiform rash improved 2 mo later; pruritus, xerosis, and paronychia persisted for 4 mo |                        |

1L, first line; 2L, second line; 3L, third line; bid, twice daily; D/C, discontinue; EC, enteric coated; F, female; M, male; mo, month(s); NSCLC, non-small cell lung cancer; NTUH, National Taiwan University Hospital; wk, week(s); y, year(s).
